# Supplementary material
Source: PubMed Central journal article supplement (PMC5081227)
Supplement: NIHMS814011-supplement.pdf [file NIHMS814011-supplement.pdf]

## Supplement Table 1.

## Plasma fatty acid composition of male and female rat fed LA+ALA diet and LA diet

| Group          | HM                           |        | HF     |        | LM            |      | LF     |      |        |               |
|----------------|------------------------------|--------|--------|--------|---------------|------|--------|------|--------|---------------|
|                | Male                         |        | Female |        | Male          |      | Female |      |        |               |
| Diet           | LA+ALA Diet                  |        |        |        | LA Diet       |      |        |      |        |               |
| Fatty Acids    | % weight of Total Fatty Acid |        |        |        |               |      |        |      |        |               |
| 10:0           | 0.14                         | ± 0.02 | 0.10   | ± 0.01 | <sup>b1</sup> | 0.10 | ± 0.01 | 0.14 | ± 0.03 |               |
| 12:0           | 1.55                         | ± 0.26 | 1.71   | ± 0.33 |               | 1.81 | ± 0.36 | 1.65 | ± 0.31 |               |
| 14:0           | 1.81                         | ± 0.22 | 2.21   | ± 0.32 | <sup>a1</sup> | 2.12 | ± 0.28 | 2.11 | ± 0.29 |               |
| 16:0           | 16.9                         | ± 0.49 | 17.5   | ± 0.68 |               | 17.4 | ± 0.59 | 16.0 | ± 0.55 | <sup>b2</sup> |
| 18:0           | 12.6                         | ± 0.45 | 14.2   | ± 0.77 | <sup>a2</sup> | 12.1 | ± 0.34 | 15.1 | ± 0.61 | <sup>a3</sup> |
| 20:0           | 0.09                         | ± 0.01 | 0.09   | ± 0.00 |               | 0.08 | ± 0.00 | 0.08 | ± 0.00 | <sup>b1</sup> |
| 24:0           | 0.20                         | ± 0.02 | 0.16   | ± 0.01 | <sup>b1</sup> | 0.16 | ± 0.01 | 0.16 | ± 0.01 |               |
| 16:1n-7        | 3.48                         | ± 0.19 | 3.76   | ± 0.20 | <sup>a2</sup> | 3.74 | ± 0.17 | 3.13 | ± 0.16 | <sup>b2</sup> |
| 18:1n-9        | 13.3                         | ± 1.54 | 16.2   | ± 2.13 | <sup>a2</sup> | 15.5 | ± 1.24 | 16.3 | ± 1.67 |               |
| 18:1n-7        | 3.12                         | ± 0.16 | 2.51   | ± 0.14 | <sup>b3</sup> | 3.69 | ± 0.18 | 2.66 | ± 0.15 | <sup>b3</sup> |
| 20:1n-9        | 0.17                         | ± 0.01 | 0.16   | ± 0.01 |               | 0.22 | ± 0.01 | 0.19 | ± 0.01 |               |
| 24:1n-9        | 0.19                         | ± 0.02 | 0.12   | ± 0.01 | <sup>b2</sup> | 0.15 | ± 0.01 | 0.13 | ± 0.01 |               |
| 18:2n-6        | 12.4                         | ± 0.41 | 11.9   | ± 0.37 | <sup>b2</sup> | 9.71 | ± 0.33 | 9.59 | ± 0.42 |               |
| 18:3n-6        | 0.18                         | ± 0.01 | 0.21   | ± 0.01 | <sup>a3</sup> | 0.18 | ± 0.01 | 0.22 | ± 0.02 | <sup>a2</sup> |
| 20:2n-6        | 0.15                         | ± 0.01 | 0.14   | ± 0.02 |               | 0.13 | ± 0.01 | 0.11 | ± 0.01 | <sup>b1</sup> |
| 20:3n-6        | 1.00                         | ± 0.04 | 0.69   | ± 0.03 | <sup>b3</sup> | 0.76 | ± 0.05 | 0.39 | ± 0.02 | <sup>b3</sup> |
| 20:4n-6        | 21.9                         | ± 1.12 | 17.2   | ± 1.17 | <sup>b3</sup> | 24.1 | ± 1.06 | 22.8 | ± 1.10 |               |
| 22:4n-6        | 0.20                         | ± 0.01 | 0.21   | ± 0.02 |               | 0.55 | ± 0.04 | 0.60 | ± 0.03 |               |
| 22:5n-6        | 0.16                         | ± 0.01 | 0.19   | ± 0.01 | <sup>a2</sup> | 2.73 | ± 0.06 | 4.36 | ± 0.15 | <sup>a3</sup> |
| 18:3n-3        | 0.58                         | ± 0.05 | 0.71   | ± 0.05 | <sup>a2</sup> | 0.07 | ± 0.02 | 0.07 | ± 0.02 |               |
| 20:5n-3        | 0.71                         | ± 0.04 | 0.78   | ± 0.06 |               | 0.02 | ± 0.00 | 0.02 | ± 0.01 |               |
| 22:5n-3        | 0.41                         | ± 0.01 | 0.41   | ± 0.01 |               | 0.04 | ± 0.00 | 0.03 | ± 0.00 | <sup>b1</sup> |
| 22:6n-3        | 4.52                         | ± 0.14 | 5.18   | ± 0.29 | <sup>a2</sup> | 0.37 | ± 0.01 | 0.54 | ± 0.03 | <sup>a3</sup> |
| 20:3n-9        | 0.24                         | ± 0.01 | 0.14   | ± 0.01 | <sup>b3</sup> | 0.42 | ± 0.02 | 0.23 | ± 0.01 | <sup>b3</sup> |
| TFA (mg/mL)    | 3.54                         | ± 0.13 | 3.69   | ± 0.19 |               | 4.47 | ± 0.24 | 3.93 | ± 0.24 |               |
| <b>Summary</b> |                              |        |        |        |               |      |        |      |        |               |
| Σ Saturates    | 33.3                         | ± 1.05 | 36.0   | ± 1.41 | <sup>a2</sup> | 33.9 | ± 1.32 | 35.3 | ± 1.28 | <sup>a2</sup> |
| Σ MUFA         | 20.3                         | ± 1.62 | 22.7   | ± 2.22 | <sup>a1</sup> | 23.3 | ± 1.28 | 22.4 | ± 1.74 |               |
| Σ n-6 PUFA     | 36.5                         | ± 1.11 | 31.0   | ± 1.18 | <sup>b3</sup> | 38.7 | ± 1.05 | 38.5 | ± 1.06 |               |
| Σ n-3 PUFA     | 6.27                         | ± 0.12 | 7.13   | ± 0.29 | <sup>a2</sup> | 0.55 | ± 0.03 | 0.72 | ± 0.03 | <sup>a3</sup> |
| n-6/n-3 PUFA   | 5.82                         | ± 0.14 | 4.35   | ± 0.06 | <sup>b3</sup> | 71.6 | ± 3.00 | 53.8 | ± 2.01 | <sup>b3</sup> |
| n-3%/HUFA      | 19.5                         | ± 0.60 | 25.9   | ± 0.56 | <sup>a3</sup> | 1.49 | ± 0.04 | 2.07 | ± 0.05 | <sup>a3</sup> |
| AA/DHA         | 4.84                         | ± 0.18 | 3.31   | ± 0.10 | <sup>b3</sup> | 64.9 | ± 2.4  | 42.4 | ± 1.6  | <sup>b3</sup> |

Data were expressed in Mean ± SEM (n=6 with 8 measurements per animal); Significant difference was tested for genders, but not for diets; a-female greater; b-female lower; paired *t-test* with  $P < 0.05(1), 0.01(2), 0.001(3)$ .
